# Supplementary material for: Association of Functional Gastrointestinal Disorders with Adolescent Idiopathic Scoliosis
Source: MDPI journal article supplement (doi:10.3390/children11010118), 2024-01-18
Supplement: s1 [file s1]

## Supplementary Materials

**Table S1.** Multivariable logistic regression analysis of adolescents with AIS, compared with age-matched control adolescents, in 2012

| Variables                   | AIS<br>(n = 2023) | Control<br>(n = 186,757) | Adjusted Odds Ratio<br>(95% CI) | p Value |
|-----------------------------|-------------------|--------------------------|---------------------------------|---------|
| FGIDs, % (n)                |                   |                          |                                 |         |
| Without FGID                | 75 (1525)         | 79 (147,567)             |                                 |         |
| With FGID                   | 25 (498)          | 21 (39,190)              | 1.21 (1.10–1.35)                | <.001   |
| Gender, % (n)               |                   |                          |                                 |         |
| Boys                        | 37 (746)          | 52 (96,668)              |                                 |         |
| Girls                       | 63 (1277)         | 48 (90,089)              | 1.84 (1.68–2.01)                | <.001   |
| Age, % (n)                  |                   |                          |                                 |         |
| 10–12 y                     | 23 (460)          | 32 (59,538)              |                                 |         |
| 13–15 y                     | 42 (845)          | 28 (52,838)              | 2.04 (1.82–2.28)                | <.001   |
| 16–19 y                     | 35 (718)          | 40 (74,381)              | 1.21 (1.08–1.37)                | <.001   |
| Insurance type, % (n)       |                   |                          |                                 |         |
| National health insurance   | 96 (1943)         | 96 (178,428)             |                                 |         |
| Medical aid                 | 4 (80)            | 4 (8329)                 | 0.86 (0.68–1.07)                | .176    |
| Residential district, % (n) |                   |                          |                                 |         |
| Metropolitan                | 26 (534)          | 16 (30,406)              |                                 |         |
| City                        | 31 (619)          | 25 (46,585)              | 0.76 (0.67–0.85)                | <.001   |
| Rural                       | 43 (870)          | 59 (109,766)             | 0.45 (0.41–0.51)                | <.001   |

**Table S2.** Multivariable logistic regression analysis of adolescents with AIS, compared with age-matched control adolescents, in 2013

| Variables                   | AIS<br>(n = 1918) | Control<br>(n = 180,183) | Adjusted Odds Ratio<br>(95% CI) | <i>p</i> Value |
|-----------------------------|-------------------|--------------------------|---------------------------------|----------------|
| FGIDs, % (n)                |                   |                          |                                 |                |
| Without FGID                | 75 (1440)         | 80(144,084)              |                                 |                |
| With FGID                   | 25 (478)          | 20 (36,099)              | 1.31 (1.18–1.46)                | <.001          |
| Gender, % (n)               |                   |                          |                                 |                |
| Boys                        | 38 (729)          | 52 (92,945)              |                                 |                |
| Girls                       | 62 (1189)         | 48 (87,238)              | 1.73 (1.58–1.90)                | <.001          |
| Age, % (n)                  |                   |                          |                                 |                |
| 10–12 y                     | 22 (426)          | 31 (55,581)              |                                 |                |
| 13–15 y                     | 40 (774)          | 29 (51,359)              | 1.94 (1.72–2.19)                | <.001          |
| 16–19 y                     | 37 (718)          | 41 (73,243)              | 1.25 (1.11–1.41)                | <.001          |
| Insurance type, % (n)       |                   |                          |                                 |                |
| National health insurance   | 97 (1867)         | 96 (172,919)             |                                 |                |
| Medical aid                 | 3 (51)            | 4 (7264)                 | 0.63 (0.48–0.83)                | .001           |
| Residential district, % (n) |                   |                          |                                 |                |
| Metropolitan                | 26 (495)          | 16 (29,358)              |                                 |                |
| City                        | 27 (527)          | 25 (45,087)              | 0.70 (0.62–0.79)                | <.001          |
| Rural                       | 47 (896)          | 59 (105,738)             | 0.51 (0.45–0.56)                | <.001          |

**Table S3.** Multivariable logistic regression analysis of adolescents with AIS, compared with age-matched control adolescents, in 2014

| Variables                   | AIS<br>(n = 2004) | Control<br>(n = 175,626) | Adjusted Odds Ratio<br>(95% CI) | <i>p</i> Value |
|-----------------------------|-------------------|--------------------------|---------------------------------|----------------|
| FGIDs, % (n)                |                   |                          |                                 |                |
| Without FGID                | 77 (1544)         | 81 (142,171)             |                                 |                |
| With FGID                   | 23 (460)          | 19 (33,455)              | 1.24 (1.12–1.38)                | <.001          |
| Gender, % (n)               |                   |                          |                                 |                |
| Boys                        | 39 (773)          | 52 (90,646)              |                                 |                |
| Girls                       | 61 (1231)         | 48 (84,980)              | 1.69 (1.55–1.85)                | <.001          |
| Age, % (n)                  |                   |                          |                                 |                |
| 10–12 y                     | 19 (376)          | 30 (52,166)              |                                 |                |
| 13–15 y                     | 40 (808)          | 29 (50,776)              | 2.19 (1.94–2.48)                | <.001          |
| 16–19 y                     | 41 (820)          | 41 (72,684)              | 1.54 (1.36–1.74)                | <.001          |
| Insurance type, % (n)       |                   |                          |                                 |                |
| National health insurance   | 97 (1942)         | 96 (168,941)             |                                 |                |
| Medical aid                 | 3 (62)            | 4 (6685)                 | 0.78 (0.61–1.01)                | .057           |
| Residential district, % (n) |                   |                          |                                 |                |
| Metropolitan                | 26 (518)          | 16 (27,958)              |                                 |                |
| City                        | 26 (528)          | 25 (43,577)              | 0.65 (0.58–0.74)                | <.001          |
| Rural                       | 48 (958)          | 59 (104,091)             | 0.50 (0.45–0.55)                | <.001          |

**Table S4.** Multivariable logistic regression analysis of adolescents with AIS, compared with age-matched control adolescents, in 2016

| Variables                   | AIS<br>(n = 1851) | Control<br>(n = 163,796) | Adjusted Odds Ratio<br>(95% CI) | <i>p</i> Value |
|-----------------------------|-------------------|--------------------------|---------------------------------|----------------|
| FGIDs, % (n)                |                   |                          |                                 |                |
| Without FGID                | 76 (1413)         | 82 (133,579)             |                                 |                |
| With FGID                   | 24 (438)          | 18 (30,217)              | 1.35 (1.21–1.50)                | <.001          |
| Gender, % (n)               |                   |                          |                                 |                |
| Boys                        | 37 (677)          | 51 (84,308)              |                                 |                |
| Girls                       | 63 (1174)         | 49 (79,488)              | 1.81 (1.65–2.00)                | <.001          |
| Age, % (n)                  |                   |                          |                                 |                |
| 10–12 y                     | 22 (405)          | 30 (48,666)              |                                 |                |
| 13–15 y                     | 38 (694)          | 28 (45,057)              | 1.83 (1.60–2.05)                | <.001          |
| 16–19 y                     | 41 (752)          | 43 (70,073)              | 1.26 (1.11–1.42)                | <.001          |
| Insurance type, % (n)       |                   |                          |                                 |                |
| National health insurance   | 97 (1788)         | 96 (157,560)             |                                 |                |
| Medical aid                 | 3 (63)            | 4 (6236)                 | 0.86 (0.67–1.11)                | .245           |
| Residential district, % (n) |                   |                          |                                 |                |
| Metropolitan                | 26 (482)          | 16 (25,472)              |                                 |                |
| City                        | 29 (528)          | 24 (39,729)              | 0.71 (0.62–0.80)                | <.001          |
| Rural                       | 45 (841)          | 60 (98,595)              | 0.45 (0.41–0.51)                | <.001          |
